# Supplementary material for: Beliefs of UK Transplant Recipients about Living Kidney Donation and Transplantation: Findings from a Multicentre Questionnaire-Based Case–Control Study
Source: PubMed Central journal article supplement (PMC7019237; doi:10.3390/jcm9010031), 2019-12-21
Supplement: jcm-09-00031-s001.pdf [file jcm-09-00031-s001.pdf]

## Supplementary material

### Supplementary Methods

The study was based at 14 UK hospitals: Belfast, Birmingham, Bristol, Cambridge, Epsom and St Helier, Guy's and St Thomas's, Imperial, Leicester, Manchester, Newcastle upon Tyne, Nottingham, Oxford, Sheffield, and St George's.

**Table S1. Responders and non-responders**

|                              | <b>Total invited</b><br>n=3103 (%) | <b>Participants</b><br>n=1240 (%) | <b>Non-participants</b><br>n=1863 (%) <sup>a</sup> |
|------------------------------|------------------------------------|-----------------------------------|----------------------------------------------------|
| <b>Sex</b>                   |                                    |                                   |                                                    |
| Male                         | 1902 (61)                          | 705 (57)                          | 1197 (64)                                          |
| Female                       | 1201 (39)                          | 514 (41)                          | 687 (37)                                           |
| Missing                      | 0                                  | 21 (2)                            | 0                                                  |
| <b>Renal Transplant type</b> |                                    |                                   |                                                    |
| Live-donor                   | 1462 (47)                          | 672 (54)                          | 790 (42)                                           |
| Deceased-donor               | 1641 (53)                          | 565 (46)                          | 1076 (58)                                          |
| Missing                      | 0                                  | 3 (0.2)                           | 0                                                  |

<sup>a</sup> As % were rounded up to the nearest whole number some totals are more than 100%. We could not analyse response by age as people were sampled by age at transplant and then asked to enter their current age in the questionnaire.

**Table S2. Responders compared to national denominator population**

| <b>Characteristics</b> |                   | <b>Study DDKT recipients</b> | <b>National population of DDKT recipients 2013-2017</b> | <b>Chi2 p-value</b> | <b>Study LDKT recipients</b> | <b>National population of LDKT recipients 2013-2017</b> | <b>Chi2 p-value</b> |
|------------------------|-------------------|------------------------------|---------------------------------------------------------|---------------------|------------------------------|---------------------------------------------------------|---------------------|
|                        |                   | %                            | %                                                       |                     | %                            | %                                                       |                     |
| <b>Sex (%)</b>         | <b>Male</b>       | 58                           | 62                                                      | 0.56                | 58                           | 59                                                      | 0.89                |
|                        | <b>Female</b>     | 42                           | 38                                                      |                     | 42                           | 41                                                      |                     |
| <b>Age (years)</b>     | <b>50-59</b>      | 28                           | 26                                                      | 0.75                | 27                           | 23                                                      | 0.51                |
|                        | <b>60-69</b>      | 24                           | 22                                                      | 0.74                | 25                           | 15                                                      | 0.08                |
| <b>Ethnicity (%)</b>   | <b>White</b>      | 82                           | 73                                                      | 0.13                | 89                           | 83                                                      | 0.22                |
|                        | <b>BAME/Other</b> | 18                           | 27                                                      |                     | 11                           | 17                                                      |                     |

Individuals with missing data for each characteristic excluded from figures to allow direct comparison to published NHS Blood and Transplant data

## **Supplementary Missing data**

### **Case-control variable**

0.24% (n=3) were missing a data on case-control status (transplant type: i) living-donor or ii) deceased-donor transplant). This was as a result of the questionnaire code not being entered by participants who chose to complete the questionnaire online. Participants for whom case-control status was not recorded were more likely to also have missing data for age (2/3 had age missing,  $\text{Chi}^2$   $p < 0.001$ ), sex (2/3 had sex missing,  $\text{Chi}^2$   $p < 0.001$ ), ethnicity (2/3 were missing ethnicity,  $\text{Chi}^2$   $p < 0.001$ ), and IMD rank quintile (2/3 were missing education,  $\text{Chi}^2$   $p < 0.001$ ).

### **Education**

6.69% (n=83) missing overall.

Those with missing data for age, sex, ethnicity, and transplant type were more likely to have missing data for this variable. When focusing on individuals with recorded demographic data (age, sex, ethnicity and transplant type), no pattern of missingness with age ( $\text{Chi}^2$   $p = 0.47$ ), sex ( $\text{Chi}^2$   $p = 0.12$ ), or transplant type ( $\text{Chi}^2$   $p = 0.17$ ) but maybe with ethnicity ( $\text{Chi}^2$   $p < 0.001$ ) – suggested that black patients' and those from 'other ethnic groups' are more likely to have missing data.

### **Age**

2.74% (n=34) missing overall.

Those with missing data for sex, ethnicity, education and transplant type were more likely to have missing data for this variable. When focusing on individuals with recorded demographic data, no pattern of missingness with sex ( $\text{Chi}^2$   $p = 0.05$ ), education (no participants with age missing but education recorded), ethnicity ( $\text{Chi}^2$   $p = 0.97$ ) or transplant type ( $\text{Chi}^2$   $p = 0.89$ ).

### **Sex**

1.69% (n=21) missing overall.

Those with missing data for age, ethnicity, education and transplant type were more likely to have missing data for this variable. When focusing on individuals with recorded demographic data, no pattern of missingness with age, education, ethnicity or transplant type ( $\text{Chi}^2$   $p = 0.75$ ).

### **Ethnicity**

2.42% (n=30) missing overall.

Those with missing data for age, ethnicity, education and transplant type were more likely to have missing data for this variable. When focusing on individuals with recorded demographic data, no

pattern of missingness with age ( $\text{Chi}^2$   $p=0.73$ ), or transplant type ( $\text{Chi}^2$   $p=0.94$ ), but maybe with sex ( $\text{Chi}^2$   $p=0.03$ ) – women more likely to have missing data, but numbers very small. Only one person had missing ethnicity and education data.

Table S3a. Difference in beliefs with participant sex

| Belief statement                                                                                                                          | Sex    | Disagree (%) | Agree (%)  | Don't know (%) | Chi <sup>2</sup> p-value |
|-------------------------------------------------------------------------------------------------------------------------------------------|--------|--------------|------------|----------------|--------------------------|
| 1. It is morally acceptable to take a kidney from a healthy person.                                                                       | Female | 35 (7.0)     | 433 (86.6) | 32 (6.4)       | 0.12                     |
|                                                                                                                                           | Male   | 30 (4.3)     | 618 (88.7) | 49 (7.0)       |                          |
| 2. Donors often agree to donate due to feelings of guilt or family pressure.                                                              | Female | 251 (49.8)   | 108 (21.4) | 145 (28.8)     | 0.15                     |
|                                                                                                                                           | Male   | 378 (54.3)   | 120 (17.2) | 198 (28.5)     |                          |
| 3. Donating a kidney is a rewarding experience for the live donors.                                                                       | Female | 14 (2.8)     | 405 (80.4) | 85 (16.9)      | 0.13                     |
|                                                                                                                                           | Male   | 12 (1.7)     | 591 (84.6) | 96 (13.7)      |                          |
| 4. Donating a kidney to someone requires an extremely close personal relationship.                                                        | Female | 340 (67.3)   | 125 (24.8) | 40 (7.9)       | 0.90                     |
|                                                                                                                                           | Male   | 471 (67.4)   | 168 (24.0) | 60 (8.6)       |                          |
| 5. A living donor kidney transplant may strengthen the relationship between the donor and recipient.                                      | Female | 64 (12.7)    | 337 (66.7) | 104 (20.6)     | 0.20                     |
|                                                                                                                                           | Male   | 77 (11.0)    | 500 (71.5) | 122 (17.5)     |                          |
| 6. Approaching a potential donor who then says no will change the relationship between the two people.                                    | Female | 221 (44.0)   | 100 (19.9) | 181 (36.1)     | 0.37                     |
|                                                                                                                                           | Male   | 336 (48.1)   | 125 (17.9) | 238 (34.1)     |                          |
| 7. Asking someone to donate makes the recipient seem selfish.                                                                             | Female | 235 (46.7)   | 148 (29.4) | 120 (23.9)     | 0.79                     |
|                                                                                                                                           | Male   | 337 (48.4)   | 193 (27.7) | 167 (24.0)     |                          |
| 8. It is acceptable for a parent to receive a kidney from his/her child (over 18 years old).                                              | Female | 69 (13.7)    | 361 (71.5) | 75 (14.9)      | <0.001                   |
|                                                                                                                                           | Male   | 54 (7.7)     | 567 (81.1) | 78 (11.2)      |                          |
| 9. Decisions about donation should be made by the donor alone. The recipient should not ask for a kidney.                                 | Female | 115 (22.8)   | 326 (64.7) | 63 (12.5)      | 0.52                     |
|                                                                                                                                           | Male   | 179 (25.6)   | 432 (61.9) | 87 (12.5)      |                          |
| 10. Since the donor operation is not risk free, someone who needs a kidney transplant should wait for a kidney from someone who has died. | Female | 420 (83.3)   | 34 (6.8)   | 50 (9.9)       | 0.49                     |
|                                                                                                                                           | Male   | 575 (82.3)   | 41 (5.9)   | 83 (11.9)      |                          |

Table S3b. Difference in beliefs with participant age

| Belief statement                                                                                                                                 | Age       | Disagree (%) | Agree (%)  | Don't know (%) | Chi <sup>2</sup> p-value |
|--------------------------------------------------------------------------------------------------------------------------------------------------|-----------|--------------|------------|----------------|--------------------------|
| <b>1. It is morally acceptable to take a kidney from a healthy person.</b>                                                                       | <60 years | 46 (6.2)     | 643 (87.3) | 48 (6.5)       | 0.25                     |
|                                                                                                                                                  | ≥60 years | 18 (4.0)     | 397 (88.8) | 32 (7.2)       |                          |
| <b>2. Donors often agree to donate due to feelings of guilt or family pressure.</b>                                                              | <60 years | 420 (56.8)   | 143 (19.4) | 176 (23.8)     | <0.001                   |
|                                                                                                                                                  | ≥60 years | 202 (45.1)   | 83 (18.5)  | 163 (36.4)     |                          |
| <b>3. Donating a kidney is a rewarding experience for the live donors.</b>                                                                       | <60 years | 20 (2.7)     | 612 (82.6) | 109 (14.7)     | 0.30                     |
|                                                                                                                                                  | ≥60 years | 6 (1.3)      | 375 (83.5) | 68 (15.1)      |                          |
| <b>4. Donating a kidney to someone requires an extremely close personal relationship.</b>                                                        | <60 years | 492 (67.4)   | 176 (24.1) | 62 (8.5)       | 0.33                     |
|                                                                                                                                                  | ≥60 years | 254 (70.8)   | 83 (23.1)  | 22 (6.1)       |                          |
| <b>5. A living donor kidney transplant may strengthen the relationship between the donor and recipient.</b>                                      | <60 years | 86 (11.6)    | 535 (72.1) | 121 (16.3)     | 0.02                     |
|                                                                                                                                                  | ≥60 years | 51 (11.4)    | 296 (65.9) | 102 (22.7)     |                          |
| <b>6. Approaching a potential donor who then says no will change the relationship between the two people.</b>                                    | <60 years | 347 (46.8)   | 164 (22.1) | 230 (31.0)     | <0.001                   |
|                                                                                                                                                  | ≥60 years | 205 (45.9)   | 59 (13.2)  | 183 (40.9)     |                          |
| <b>7. Asking someone to donate makes the recipient seem selfish.</b>                                                                             | <60 years | 393 (53.2)   | 210 (28.4) | 136 (18.4)     | <0.001                   |
|                                                                                                                                                  | ≥60 years | 176 (29.3)   | 129 (28.8) | 143 (31.9)     |                          |
| <b>8. It is acceptable for a parent to receive a kidney from his/her child (over 18 years old).</b>                                              | <60 years | 71 (9.6)     | 584 (78.7) | 87 (11.7)      | 0.23                     |
|                                                                                                                                                  | ≥60 years | 52 (11.6)    | 334 (74.4) | 63 (14.0)      |                          |
| <b>9. Decisions about donation should be made by the donor alone. The recipient should not ask for a kidney.</b>                                 | <60 years | 223 (30.1)   | 420 (56.8) | 97 (13.1)      | <0.001                   |
|                                                                                                                                                  | ≥60 years | 69 (15.4)    | 328 (73.1) | 52 (11.6)      |                          |
| <b>10. Since the donor operation is not risk free, someone who needs a kidney transplant should wait for a kidney from someone who has died.</b> | <60 years | 625 (84.4)   | 38 (5.1)   | 78 (10.5)      | 0.09                     |
|                                                                                                                                                  | ≥60 years | 360 (80.2)   | 36 (8.0)   | 53 (11.8)      |                          |

**Table S3c. Difference in beliefs with participant education**

| <b>Belief statement</b>                                                                                                                          | <b>Higher education level</b>                   | <b>Disagree (%)</b>      | <b>Agree (%)</b>         | <b>Don't know (%)</b>    | <b>Chi<sup>2</sup> p-value</b> |
|--------------------------------------------------------------------------------------------------------------------------------------------------|-------------------------------------------------|--------------------------|--------------------------|--------------------------|--------------------------------|
| <b>1. It is morally acceptable to take a kidney from a healthy person.</b>                                                                       | No university education<br>University education | 34 (4.7)<br>21 (5.9)     | 637 (87.9)<br>322 (90.2) | 54 (7.5)<br>14 (3.9)     | 0.06                           |
| <b>2. Donors often agree to donate due to feelings of guilt or family pressure.</b>                                                              | No university education<br>University education | 388 (53.4)<br>181 (50.6) | 137 (18.8)<br>72 (20.1)  | 202 (27.8)<br>105 (29.3) | 0.68                           |
| <b>3. Donating a kidney is a rewarding experience for the live donors.</b>                                                                       | No university education<br>University education | 19 (2.6)<br>4 (1.1)      | 616 (84.4)<br>298 (83.2) | 95 (13.0)<br>56 (15.6)   | 0.15                           |
| <b>4. Donating a kidney to someone requires an extremely close personal relationship.</b>                                                        | No university education<br>University education | 492 (67.4)<br>254 (70.8) | 176 (24.1)<br>83 (23.1)  | 62 (8.5)<br>22 (6.1)     | 0.33                           |
| <b>5. A living donor kidney transplant may strengthen the relationship between the donor and recipient.</b>                                      | No university education<br>University education | 94 (12.9)<br>26 (7.2)    | 504 (69.0)<br>276 (76.9) | 132 (18.1)<br>57 (15.9)  | 0.008                          |
| <b>6. Approaching a potential donor who then says no will change the relationship between the two people.</b>                                    | No university education<br>University education | 358 (49.2)<br>151 (42.1) | 122 (16.8)<br>82 (22.8)  | 248 (34.1)<br>126 (35.1) | 0.03                           |
| <b>7. Asking someone to donate makes the recipient seem selfish.</b>                                                                             | No university education<br>University education | 332 (45.7)<br>188 (52.4) | 204 (28.1)<br>105 (29.3) | 190 (26.2)<br>66 (18.4)  | 0.01                           |
| <b>8. It is acceptable for a parent to receive a kidney from his/her child (over 18 years old).</b>                                              | No university education<br>University education | 75 (10.3)<br>38 (10.6)   | 568 (77.8)<br>282 (78.6) | 87 (11.9)<br>39 (10.9)   | 0.87                           |
| <b>9. Decisions about donation should be made by the donor alone. The recipient should not ask for a kidney.</b>                                 | No university education<br>University education | 166 (22.7)<br>103 (28.9) | 482 (66.0)<br>208 (58.3) | 82 (11.2)<br>46 (12.9)   | 0.04                           |
| <b>10. Since the donor operation is not risk free, someone who needs a kidney transplant should wait for a kidney from someone who has died.</b> | No university education<br>University education | 604 (82.9)<br>306 (85.2) | 51 (7.0)<br>19 (5.3)     | 74 (10.2)<br>34 (9.5)    | 0.51                           |

**Table S3d. Difference in beliefs with participant ethnicity**

| <b>Belief statement</b>                                                                                                                          | <b>Ethnicity</b>           | <b>Disagree (%)</b>      | <b>Agree (%)</b>         | <b>Don't know (%)</b>   | <b>Chi<sup>2</sup> p-value</b> |
|--------------------------------------------------------------------------------------------------------------------------------------------------|----------------------------|--------------------------|--------------------------|-------------------------|--------------------------------|
| <b>1. It is morally acceptable to take a kidney from a healthy person.</b>                                                                       | White<br>BAME <sup>a</sup> | 54 (5.4)<br>11 (6.6)     | 900 (89.1)<br>134 (80.7) | 56 (5.5)<br>21 (12.7)   | 0.002                          |
| <b>2. Donors often agree to donate due to feelings of guilt or family pressure.</b>                                                              | White<br>BAME              | 535 (52.9)<br>83 (49.7)  | 192 (10.0)<br>31 (18.6)  | 285 (28.2)<br>53 (31.7) | 0.63                           |
| <b>3. Donating a kidney is a rewarding experience for the live donors.</b>                                                                       | White<br>BAME              | 22 (2.2)<br>4 (2.4)      | 855 (84.2)<br>129 (77.3) | 138 (13.6)<br>34 (20.4) | 0.07                           |
| <b>4. Donating a kidney to someone requires an extremely close personal relationship.</b>                                                        | White<br>BAME              | 697 (68.7)<br>104 (61.9) | 244 (24.0)<br>43 (25.6)  | 74 (7.3)<br>21 (12.5)   | 0.05                           |
| <b>5. A living donor kidney transplant may strengthen the relationship between the donor and recipient.</b>                                      | White<br>BAME              | 114 (11.2)<br>24 (14.3)  | 715 (70.4)<br>109 (64.9) | 186 (18.3)<br>35 (20.8) | 0.32                           |
| <b>6. Approaching a potential donor who then says no will change the relationship between the two people.</b>                                    | White<br>BAME              | 471 (46.5)<br>81 (48.2)  | 190 (18.8)<br>29 (17.3)  | 351 (34.7)<br>58 (34.5) | 0.88                           |
| <b>7. Asking someone to donate makes the recipient seem selfish.</b>                                                                             | White<br>BAME              | 483 (47.7)<br>79 (47.3)  | 292 (28.9)<br>45 (27.0)  | 237 (23.4)<br>43 (25.8) | 0.77                           |
| <b>8. It is acceptable for a parent to receive a kidney from his/her child (over 18 years old).</b>                                              | White<br>BAME              | 104 (10.3)<br>16 (9.5)   | 787 (77.5)<br>127 (75.6) | 124 (12.2)<br>25 (14.9) | 0.62                           |
| <b>9. Decisions about donation should be made by the donor alone. The recipient should not ask for a kidney.</b>                                 | White<br>BAME              | 247 (24.4)<br>43 (25.6)  | 649 (64.1)<br>99 (58.9)  | 117 (11.6)<br>26 (15.5) | 0.28                           |
| <b>10. Since the donor operation is not risk free, someone who needs a kidney transplant should wait for a kidney from someone who has died.</b> | White<br>BAME              | 864 (85.2)<br>116 (69.1) | 57 (5.6)<br>16 (9.5)     | 93 (9.2)<br>36 (21.4)   | <0.001                         |

<sup>a</sup> BAME - Black, Asian and Minority Ethnic group

**Table S3e. Difference in beliefs with participant religion**

| <b>Belief statement</b>                                                                                                                          | <b>Religion</b>             | <b>Disagree (%)</b> | <b>Agree (%)</b> | <b>Don't know (%)</b> | <b>Chi<sup>2</sup> p-value</b> |
|--------------------------------------------------------------------------------------------------------------------------------------------------|-----------------------------|---------------------|------------------|-----------------------|--------------------------------|
| <b>1. It is morally acceptable to take a kidney from a healthy person.</b>                                                                       | No religion                 | 18 (5.5)            | 291 (89.3)       | 17 (5.2)              | 0.01                           |
|                                                                                                                                                  | Christian                   | 33 (4.7)            | 626 (88.7)       | 47 (6.7)              |                                |
|                                                                                                                                                  | Other religion <sup>a</sup> | 10 (8.9)            | 88 (77.9)        | 15 (13.3)             |                                |
| <b>2. Donors often agree to donate due to feelings of guilt or family pressure.</b>                                                              | No religion                 | 161 (49.1)          | 71 (21.7)        | 96 (29.3)             | 0.22                           |
|                                                                                                                                                  | Christian                   | 389 (55.0)          | 123 (17.4)       | 195 (27.6)            |                                |
|                                                                                                                                                  | Other religion              | 54 (47.8)           | 27 (23.9)        | 32 (28.3)             |                                |
| <b>3. Donating a kidney is a rewarding experience for the live donors.</b>                                                                       | No religion                 | 3 (0.9)             | 264 (80.0)       | 63 (19.1)             | <0.001                         |
|                                                                                                                                                  | Christian                   | 19 (2.7)            | 612 (86.4)       | 77 (10.9)             |                                |
|                                                                                                                                                  | Other religion              | 4 (3.5)             | 82 (72.6)        | 27 (23.9)             |                                |
| <b>4. Donating a kidney to someone requires an extremely close personal relationship.</b>                                                        | No religion                 | 232 (70.3)          | 73 (22.1)        | 25 (7.6)              | 0.08                           |
|                                                                                                                                                  | Christian                   | 481 (67.8)          | 176 (24.8)       | 52 (7.3)              |                                |
|                                                                                                                                                  | Other religion              | 67 (59.3)           | 30 (26.6)        | 16 (14.2)             |                                |
| <b>5. A living donor kidney transplant may strengthen the relationship between the donor and recipient.</b>                                      | No religion                 | 36 (10.9)           | 231 (70.0)       | 63 (19.1)             | 0.82                           |
|                                                                                                                                                  | Christian                   | 83 (11.7)           | 501 (70.7)       | 125 (17.6)            |                                |
|                                                                                                                                                  | Other religion              | 13 (11.5)           | 75 (66.4)        | 25 (22.1)             |                                |
| <b>6. Approaching a potential donor who then says no will change the relationship between the two people.</b>                                    | No religion                 | 139 (42.1)          | 83 (25.2)        | 108 (32.7)            | 0.008                          |
|                                                                                                                                                  | Christian                   | 344 (48.7)          | 111 (15.7)       | 251 (35.6)            |                                |
|                                                                                                                                                  | Other religion              | 49 (43.4)           | 24 (21.2)        | 40 (35.4)             |                                |
| <b>7. Asking someone to donate makes the recipient seem selfish.</b>                                                                             | No religion                 | 153 (46.5)          | 108 (32.8)       | 68 (20.7)             | 0.30                           |
|                                                                                                                                                  | Christian                   | 350 (49.5)          | 188 (26.6)       | 169 (23.9)            |                                |
|                                                                                                                                                  | Other religion              | 51 (45.5)           | 35 (31.3)        | 26 (23.2)             |                                |
| <b>8. It is acceptable for a parent to receive a kidney from his/her child (over 18 years old).</b>                                              | No religion                 | 37 (11.2)           | 261 (79.1)       | 32 (9.7)              | 0.31                           |
|                                                                                                                                                  | Christian                   | 69 (9.7)            | 542 (76.5)       | 98 (13.8)             |                                |
|                                                                                                                                                  | Other religion              | 12 (10.6)           | 83 (73.5)        | 18 (15.9)             |                                |
| <b>9. Decisions about donation should be made by the donor alone. The recipient should not ask for a kidney.</b>                                 | No religion                 | 82 (25.0)           | 205 (62.5)       | 41 (12.5)             | 0.32                           |
|                                                                                                                                                  | Christian                   | 165 (23.3)          | 460 (64.9)       | 84 (11.9)             |                                |
|                                                                                                                                                  | Other religion              | 36 (31.9)           | 62 (54.9)        | 15 (13.3)             |                                |
| <b>10. Since the donor operation is not risk free, someone who needs a kidney transplant should wait for a kidney from someone who has died.</b> | No religion                 | 292 (88.8)          | 11 (3.3)         | 26 (7.9)              | <0.001                         |
|                                                                                                                                                  | Christian                   | 594 (83.8)          | 46 (6.5)         | 69 (9.7)              |                                |
|                                                                                                                                                  | Other religion              | 73 (64.6)           | 13 (11.5)        | 27 (23.9)             |                                |

<sup>a</sup> Muslim/Hindu/Jewish/Sikh/Buddhist/Other - combined due to small numbers including single participant responders in some groups risking identification.



**Table S4. Comparison with participants in ATTOM study**

ATTOM study - 72% of invited participants in final analysis

Bailey et al study - 40% of invited participants in final analysis

|                                                        | <b>ATTOM participants<br/>Likelihood of LDKT over DDKT<br/>Unadjusted OR (p-value)</b> | <b>Participants in Bailey et al study<br/>Likelihood of LDKT over DDKT<br/>Unadjusted OR (p-value)</b> |
|--------------------------------------------------------|----------------------------------------------------------------------------------------|--------------------------------------------------------------------------------------------------------|
| <b>No qualifications<br/>University</b>                | Reference<br>0.39 (p <0.001)                                                           | Reference<br>0.46 (p=0.02)                                                                             |
| <b>School level education<br/>University education</b> | Reference<br>0.73 (p=0.009)                                                            | Reference<br>0.72 (p=0.05)                                                                             |

|                                                        | <b>ATTOM participants<br/>Likelihood of LDKT over DDKT<br/>Adjusted OR (p-value)</b> | <b>Participants in Bailey et al study<br/>Likelihood of LDKT over DDKT<br/>Adjusted OR (p-value)</b> |
|--------------------------------------------------------|--------------------------------------------------------------------------------------|------------------------------------------------------------------------------------------------------|
| <b>No qualifications<br/>University</b>                | Reference<br>0.55 (p <0.001)                                                         | Reference<br>0.48 (p=0.03)                                                                           |
| <b>School level education<br/>University education</b> | Reference<br>0.76 (p=0.01)                                                           | Reference<br>0.69 (p=0.001)                                                                          |
